# Supplementary material for: Distributionally robust optimization for fire station location under uncertainties
Source: Springer Nature journal article supplement (doi:10.1038/s41598-022-08887-6), 2022-03-30
Supplement: 41598_2022_8887_MOESM1_ESM.pdf [file 41598_2022_8887_MOESM1_ESM.pdf]

## Appendix

### Proof for the reformulation of the worst-case expectation problem

Based on the definition of objective function (10), an explicit expression for the worst-case expectation problem is given by:

$$\sup_{F \in \overline{\mathcal{F}}} \mathbb{E}_F[\theta \sum_{i \in I} \sum_{j \in J} T_{ij} X_{ij} + \eta \sum_{i \in I} \sum_{j \in J} X_{ij} (T_{ij} - T_0)^+] + \sup_{G \in \overline{\mathcal{G}}} \mathbb{E}_G[\beta \sum_{i \in I} (D_i - \sum_{j \in J} X_{ij})^+]$$

s.t.

$$\begin{aligned} \int_{\overline{\mathbb{E}}_1} dF(\mathbf{T}, \mathbf{v}) &= 1 \\ \int_{\overline{\mathbb{E}}_2} dG(\mathbf{D}, \mathbf{u}) &= 1 \\ \int_{\overline{\mathbb{E}}_1} T_{ij} dF(\mathbf{T}, \mathbf{v}) &= \mu_{T_{ij}} \quad \forall i \in I, \forall j \in J \\ \int_{\overline{\mathbb{E}}_1} v_{ij} dF(\mathbf{T}, \mathbf{v}) &= \sigma_{T_{ij}} \quad \forall i \in I, \forall j \in J \\ \int_{\overline{\mathbb{E}}_2} D_i dG(\mathbf{D}, \mathbf{u}) &= \mu_{D_i} \quad \forall i \in I \\ \int_{\overline{\mathbb{E}}_2} u_i dG(\mathbf{D}, \mathbf{u}) &= \sigma_{D_i} \quad \forall i \in I \\ dF(\mathbf{T}, \mathbf{v}) &\geq 0 \\ dG(\mathbf{D}, \mathbf{u}) &\geq 0. \end{aligned}$$

Here the decision variables are the joint probability density function  $dF(\mathbf{T}, \mathbf{v})$  and  $dG(\mathbf{D}, \mathbf{u})$  or the probability measure  $F$  and  $G$ . By associating Lagrange multipliers  $\phi_1, \phi_2, \mathbf{p}, \mathbf{q}, \mathbf{r}$  and  $s$  with the constraints, we obtain the following Lagrangian

$$\begin{aligned} L(F, G, \phi_1, \phi_2, \mathbf{p}, \mathbf{q}, \mathbf{r}, s) &= \int_{\overline{\mathbb{E}}_1} [\theta \mathbf{X}^T \mathbf{T} + \eta \mathbf{X}^T (\mathbf{T} - T_0)^+] dF(\mathbf{T}, \mathbf{v}) + \phi_1 (1 - \int_{\overline{\mathbb{E}}_1} dF(\mathbf{T}, \mathbf{v})) + \mathbf{p}^T (\boldsymbol{\mu}_T - \int_{\overline{\mathbb{E}}_1} \mathbf{T} dF(\mathbf{T}, \mathbf{v})) \\ &+ \mathbf{q}^T (\boldsymbol{\sigma}_T - \int_{\overline{\mathbb{E}}_1} \mathbf{v} dF(\mathbf{T}, \mathbf{v})) + \int_{\overline{\mathbb{E}}_2} [\beta \sum_{i \in I} (D_i - \sum_{j \in J} X_{ij})^+] dG(\mathbf{D}, \mathbf{u}) + \phi_2 (1 - \int_{\overline{\mathbb{E}}_2} dG(\mathbf{D}, \mathbf{u})) \\ &+ \mathbf{r}^T (\boldsymbol{\mu}_D - \int_{\overline{\mathbb{E}}_2} \mathbf{D} dG(\mathbf{D}, \mathbf{u})) + s^T (\boldsymbol{\sigma}_D - \int_{\overline{\mathbb{E}}_2} \mathbf{u} dG(\mathbf{D}, \mathbf{u})) \\ &= \phi_1 + \phi_2 + \mathbf{p}^T \boldsymbol{\mu}_T + \mathbf{q}^T \boldsymbol{\sigma}_T + \mathbf{r}^T \boldsymbol{\mu}_D + s^T \boldsymbol{\sigma}_D + \int_{\overline{\mathbb{E}}_1} [(\theta \mathbf{X}^T - \mathbf{p}_T) \mathbf{T} + \eta \mathbf{X}^T (\mathbf{T} - T_0)^+ - \phi_1 - \mathbf{q}^T \mathbf{v}] dF(\mathbf{T}, \mathbf{v}) \\ &+ \int_{\overline{\mathbb{E}}_2} [\beta \sum_{i \in I} (D_i - \sum_{j \in J} X_{ij})^+ - \phi_2 - \mathbf{r}^T \mathbf{D} - s^T \mathbf{u}] dG(\mathbf{D}, \mathbf{u}) \end{aligned}$$

The lagrangian dual can then be written as:

$$g(\phi_1, \phi_2, \mathbf{p}, \mathbf{q}, \mathbf{r}, s) = \sup_{F, G} L(F, G, \phi_1, \phi_2, \mathbf{p}, \mathbf{q}, \mathbf{r}, s) = \phi_1 + \phi_2 + \mathbf{p}^T \boldsymbol{\mu}_T + \mathbf{q}^T \boldsymbol{\sigma}_T + \mathbf{r}^T \boldsymbol{\mu}_D + s^T \boldsymbol{\sigma}_D,$$

if  $(\theta \mathbf{X}^T - \mathbf{p}_T) \mathbf{T} + \eta \mathbf{X}^T (\mathbf{T} - T_0)^+ - \phi_1 - \mathbf{q}^T \mathbf{v} \leq 0, \forall (\mathbf{T}, \mathbf{v}) \in \overline{\mathbb{E}}_1$ , and  $\beta \sum_{i \in I} (D_i - \sum_{j \in J} X_{ij})^+ - \phi_2 - \mathbf{r}^T \mathbf{D} - s^T \mathbf{u} \leq 0, \forall (\mathbf{D}, \mathbf{u}) \in \overline{\mathbb{E}}_2$ . In fact, if there exists  $(\mathbf{T}^*, \mathbf{v}^*) \in \overline{\mathbb{E}}_1, (\mathbf{D}^*, \mathbf{u}^*) \in \overline{\mathbb{E}}_2$  such that  $(\theta \mathbf{X}^T - \mathbf{p}_T) \mathbf{T}^* + \eta \mathbf{X}^T (\mathbf{T}^* - T_0)^+ - \phi_1 - \mathbf{q}^T \mathbf{v}^* \geq 0$  and  $\beta \sum_{i \in I} (D_i^* - \sum_{j \in J} X_{ij}^*)^+ - \phi_2 - \mathbf{r}^T \mathbf{D}^* - s^T \mathbf{u}^* \geq 0$ , then the dual function  $g(\phi_1, \phi_2, \mathbf{p}, \mathbf{q}, \mathbf{r}, s)$  will be unbounded because  $dF(\mathbf{T}, \mathbf{v}) \geq 0, dG(\mathbf{D}, \mathbf{u}) \geq 0$ .

Using these observations, we conclude that the dual model of the worst-case expectation problem can be written as

$$\begin{aligned} \min_{\phi_1, \phi_2, \mathbf{p}, \mathbf{q}, \mathbf{r}, s} \quad & \phi_1 + \phi_2 + \mathbf{p}^T \boldsymbol{\mu}_T + \mathbf{q}^T \boldsymbol{\sigma}_T + \mathbf{r}^T \boldsymbol{\mu}_D + s^T \boldsymbol{\sigma}_D \\ \text{s.t.} \quad & (\theta \mathbf{X}^T - \mathbf{p}_T) \mathbf{T} + \eta \mathbf{X}^T (\mathbf{T} - T_0)^+ - \mathbf{q}^T \mathbf{v} \leq \phi_1 \quad \forall (\mathbf{T}, \mathbf{v}) \in \overline{\mathbb{E}}_1 \\ & \beta \sum_{i \in I} (D_i - \sum_{j \in J} X_{ij})^+ - \mathbf{r}^T \mathbf{D} - s^T \mathbf{u} \leq \phi_2 \quad \forall (\mathbf{D}, \mathbf{u}) \in \overline{\mathbb{E}}_2, \\ & \mathbf{q} \geq 0, s \geq 0. \end{aligned}$$

For this conic optimization problem, strong duality holds<sup>1</sup>, and hence the optimal value of the dual problem is identical to that of the primal problem.

### Stochastic programming model

In the stochastic fire station location problem, demands and travel durations are modeled as random variables  $\mathbf{T} = (T_{ij})_{i \in I, j \in J}$  and  $\mathbf{D} = (D_i)_{i \in I}$  with given probability distributions  $F_S$  and  $G_S$ , respectively. The model is given as follows:

$$w_S^* = \min \sum_{j \in J} (Ms \cdot Z_j + Mv \cdot N_j) + \mathbb{E}_{F_S} [\theta \sum_{i \in I} \sum_{j \in J} T_{ij} X_{ij} + \eta \sum_{i \in I} \sum_{j \in J} X_{ij} (T_{ij} - T_0)^+] + \mathbb{E}_{G_S} \beta \sum_{i \in I} (D_i - \sum_{j \in J} X_{ij})^+$$

$$s.t. \quad (11) - (15).$$

This stochastic programming model is often intractable<sup>2</sup>. Thus, Denton et al.<sup>3</sup> suggest using the sample average approximation technique to reformulate it as follows:

$$w_S^* = \min \sum_{j \in J} (Ms \cdot Z_j + Mv \cdot N_j) + K_1^{-1} \sum_{\omega_1 \in \Omega_1} [\theta \sum_{i \in I} \sum_{j \in J} T_{ij}^{\omega_1} X_{ij} + \eta \sum_{i \in I} \sum_{j \in J} X_{ij} (T_{ij}^{\omega_1} - T_0)^+] + K_2^{-1} \sum_{\omega_2 \in \Omega_2} \beta \sum_{i \in I} (D_i^{\omega_2} - \sum_{j \in J} X_{ij})^+$$

$$s.t. \quad (11) - (15).$$

Here,  $\omega_1$  and  $\omega_2$  represent sample indices, while  $\Omega_1$  and  $\Omega_2$  denote the set of all indices. Specifically,  $T_{ij}^{\omega_1}$  represents the travel duration from fire station  $j \in J$  to demand site  $i \in I$  in sample  $\omega_1 \in \Omega_1 = \{1, 2, \dots, K_1\}$ . Similarly,  $D_i^{\omega_2}$  represents the demand for site  $i \in I$  in sample  $\omega_2 \in \Omega_2 = \{1, 2, \dots, K_1\}$ . By introducing variables  $q_{ij}^{\omega_1}$  and  $o_i^{\omega_2}$  that capture the overtime for travel time  $T_{ij}$  in sample  $\omega_1 \in \Omega_1$  and the shortage for demand service  $D_i$  in sample  $\omega_2 \in \Omega_2$ , the problem can be further reformulated as a mixed integer linear programming model:

$$w_S^* = \min \sum_{j \in J} (Ms \cdot Z_j + Mv \cdot N_j) + K_1^{-1} \sum_{\omega_1 \in \Omega_1} [\theta \sum_{i \in I} \sum_{j \in J} T_{ij}^{\omega_1} X_{ij} + \eta \sum_{i \in I} \sum_{j \in J} q_{ij}^{\omega_1}] + K_2^{-1} \sum_{\omega_2 \in \Omega_2} \beta \sum_{i \in I} o_i^{\omega_2}$$

$$s.t. \quad q_{ij}^{\omega_1} \geq X_{ij} (T_{ij}^{\omega_1} - T_0) \quad \forall i \in I, j \in J, \omega_1 \in \Omega_1, \forall (\mathbf{T}, \mathbf{v}) \in \bar{\mathbb{E}}_1$$

$$q_{ij}^{\omega_1} \geq 0 \quad \forall i \in I, j \in J, \omega_1 \in \Omega_1, \forall (\mathbf{T}, \mathbf{v}) \in \bar{\mathbb{E}}_1$$

$$o_i^{\omega_2} \geq D_i^{\omega_2} - \sum_{j \in J} X_{ij} \quad \forall i \in I, \omega_2 \in \Omega_2, \forall (\mathbf{D}, \mathbf{u}) \in \bar{\mathbb{E}}_2$$

$$o_i^{\omega_2} \geq 0 \quad \forall i \in I, \omega_2 \in \Omega_2, \forall (\mathbf{D}, \mathbf{u}) \in \bar{\mathbb{E}}_2$$

$$(11) - (15).$$

This model can be solved directly by commercial solvers such as GUROBI.

### References

1. Shapiro, A. On duality theory of conic linear problems. In *Semi-infinite programming*, 135–165 (Springer, 2001).
2. Hanasusanto, G. A., Kuhn, D. & Wiesemann, W. A comment on "computational complexity of stochastic programming problems". *Math. Program.* **159**, 557–569 (2016).
3. Denton, B. T., Miller, A. J., Balasubramanian, H. J. & Huschka, T. R. Optimal allocation of surgery blocks to operating rooms under uncertainty. *Oper. Res.* **58**, 802–816 (2010).
